# Supplementary material
Source: publisher figshare collection journal article supplement (https://acs.figshare.com/ndownloader/files/4513693)
Supplement: Supplementary file 1 [file 4513693]

## Supporting Information

# Template-Free and Scalable Synthesis of Core-Shell and Hollow BaTiO<sub>3</sub> Particles: Using Molten Hydrated Salt as a Solvent

**Rutile TiO<sub>2</sub> powder:** The rutile TiO<sub>2</sub> powder was prepared using a procedure similar to the reported method (Ref. S1). In a typical synthesis, an aqueous solution of TiCl<sub>3</sub> (0.13 M) supersaturated with NaCl was loaded into a Teflon-lined autoclave and then heated to 160 °C for 2 hours. After cooling to room temperature, the obtained products were washed with distilled water and ethanol thoroughly, and then dried naturally. Figure S1 shows the TEM images of the products. The size of the TiO<sub>2</sub> particles is in the range of 0.8-2.5 μm. As commercial TiO<sub>2</sub> often consists of rutile and anatase phases, it is not convenient to investigate the phase transformation from TiO<sub>2</sub> to BaTiO<sub>3</sub> using XRD. Therefore using the rutile pure phase as precursor can favor the identification of XRD peaks during the synthesis (see Fig. 1 in the article).
